# Supplementary material for: A new supramolecular polyhedral oligomeric silsesquioxanes (POSS)–porphyrin nanohybrid: synthesis and spectroscopic characterization
Source: Royal Society of Chemistry journal article supplement (doi:10.1039/c3tc30532e), 2013-01-01
Supplement: c3tc30532e.pdf [file c3tc30532e.pdf]

## Electronic Supplementary Information

*for*

# **A new supramolecular polyhedral oligomeric silsesquioxanes (POSS)-porphyrin nano hybrid: synthesis and spectroscopic characterization**

**Maria Angela Castriciano,<sup>a\*</sup> Nancy Leone,<sup>b</sup> Paola Cardiano,<sup>c</sup> Sundar Manickam,<sup>c</sup> Luigi Monsù Scolaro,<sup>a,b</sup> Sandra Lo Schiavo.<sup>b</sup>**

<sup>a</sup> CNR-ISMN V.le F. Stagno D'Alcontres n.31 Vill. S. Agata, 98166 Messina, Italy. Fax and Tel: +39 090 3974108; E-mail: castriciano@pa.ismn.cnr.it

<sup>b</sup> CNR-IPCF V.le F. Stagno D'Alcontres, Faro Superiore, 98158 Messina, Italy. Fax. +39 090 3974130 Tel. +39 090 397622xx

E-mail: [leone@ipcf.cnr.it](mailto:leone@ipcf.cnr.it)

<sup>c</sup> Dipartimento di Scienze Chimiche, University of Messina, V.le F. Stagno D'Alcontres n.31 Vill. S. Agata, 98166 Messina, Fax: +39 090 393756, Tel: +39 090 67657xx. E-mail: [sloschiavo@unime.it](mailto:sloschiavo@unime.it)

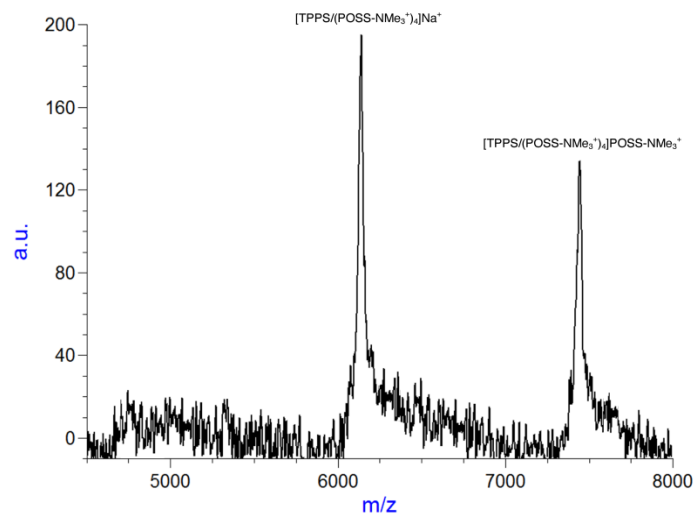

**Figure S1.** MALDI-TOF Matrix-assisted laser desorption/ionization-time of flight mass spectrum of TPPS@POSS adduct

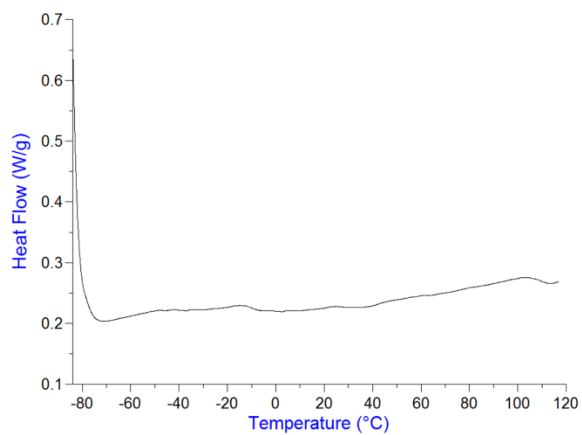

**Figure S2.** DSC: Differential scanning calorimetry trace for TPPS@POSS adduct

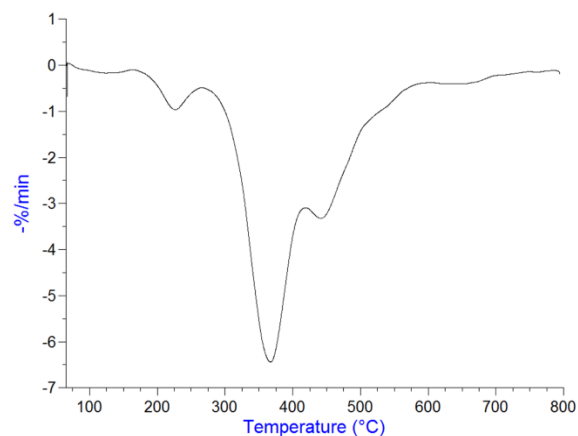

**Figure S3** DTG: Derivative thermogravimetric curve of TPPS@POSS adduct, under nitrogen flow

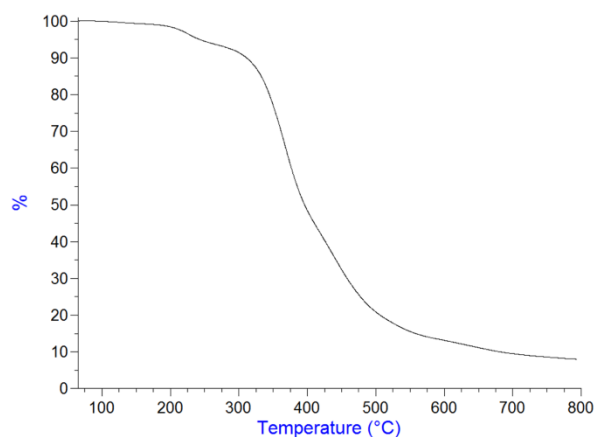

**Figure S4.** TGA: Thermogravimetric trace of TPPS@POSS adduct, under nitrogen flow.

Table 1 Thermal properties of Porph-POSS<sub>n</sub>

| $T_g/^\circ\text{C}$ | $T_{\text{onset}}/^\circ\text{C}$<br>(I step) | $T_{\text{onset}}/^\circ\text{C}$<br>(II step) | $T_{\text{max}}^a/^\circ\text{C}$<br>(II step) | Residue <sup>b</sup> /% |
|----------------------|-----------------------------------------------|------------------------------------------------|------------------------------------------------|-------------------------|
| -                    | 208.1                                         | 303.9                                          | 366.2                                          | 8.0                     |

<sup>a</sup>  $T_{\text{max}}$ : temperature of maximum rate of degradation.

<sup>b</sup> Residue at 800 °C under N<sub>2</sub> flow.

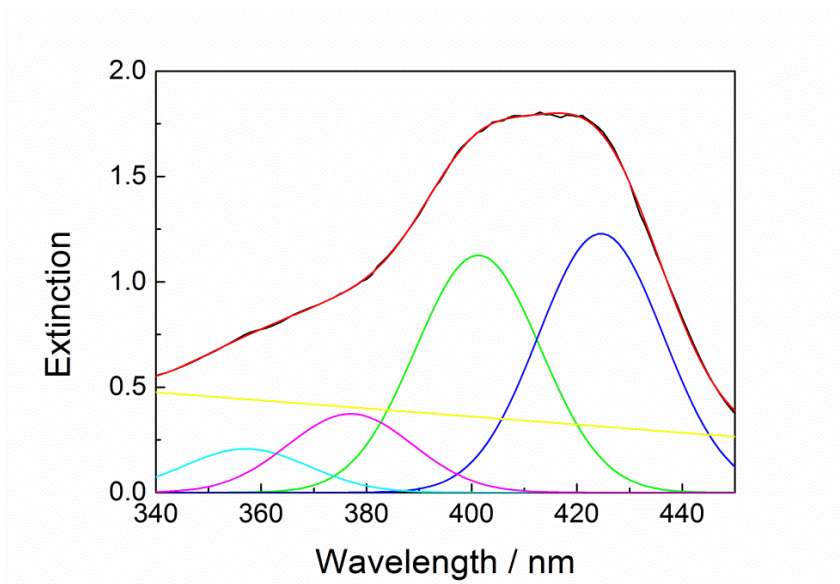

**Figure S5.** Extinction spectra of TPPS@POSS adduct on optical windows and relative deconvolution.

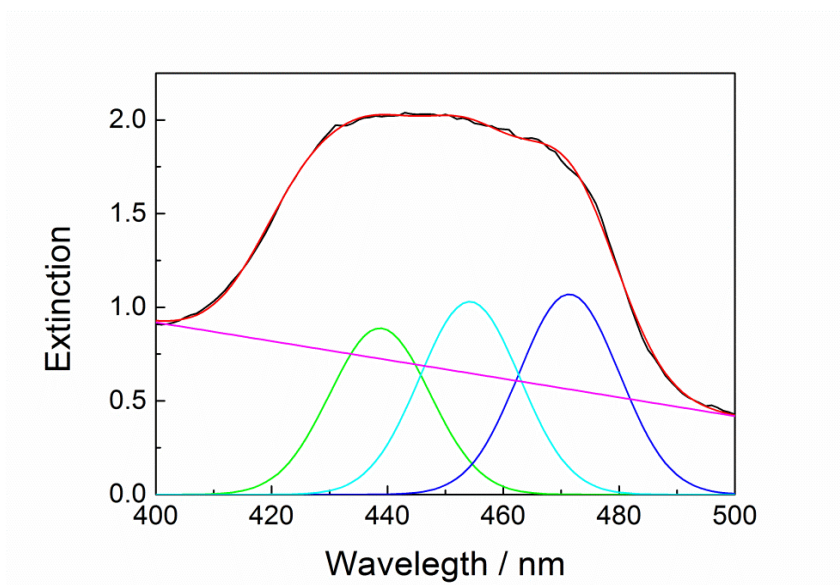

**Figure S6.** Extinction spectra of TPPS@POSS adduct on optical windows exposed to HCl vapors and relative deconvolution.

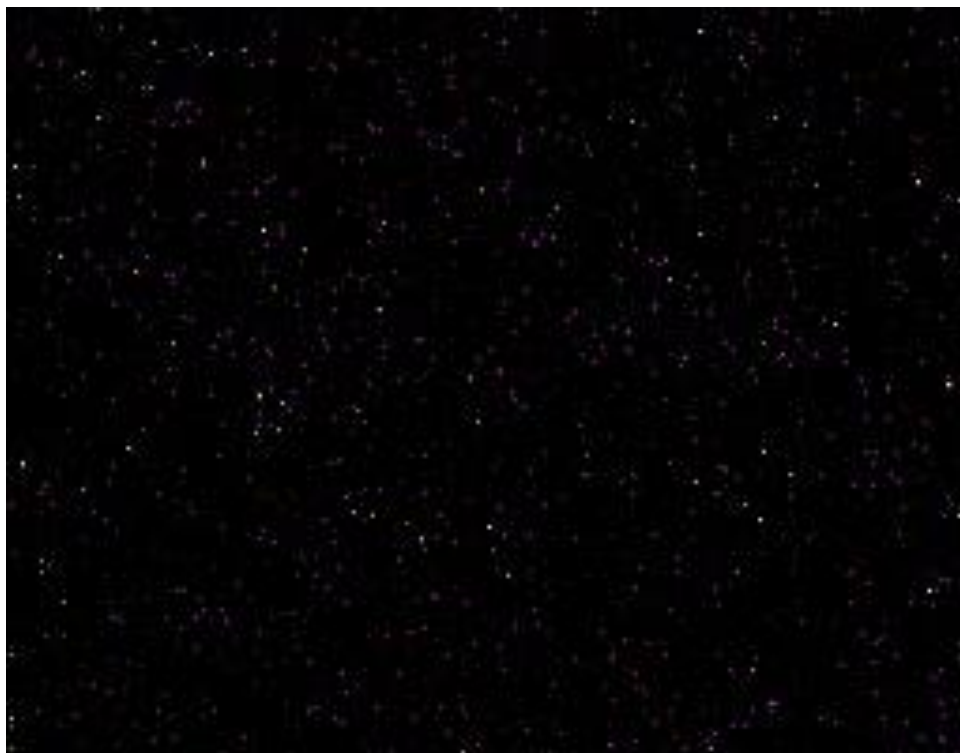

**Figure S7** TPPS@POSS EDX analysis. Overlapping zones (Yellow for Si and purple for S) look blurred.

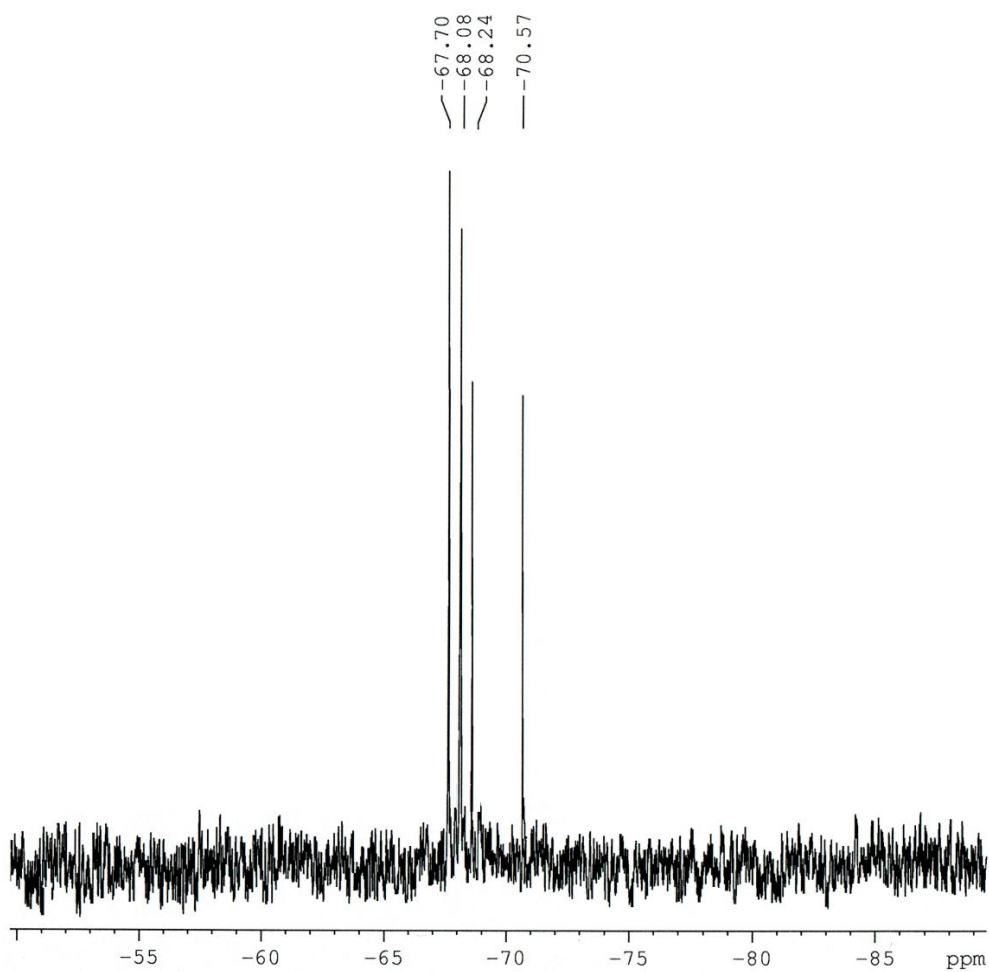

**Figure S8** <sup>29</sup>Si NMR spectrum of TPPS@POSS in CDCl<sub>3</sub>
